# Supplementary material
Source: publisher site journal article supplement (https://www.spandidos-publications.com/2609/downloadSupplementary)
Supplement: Supplementary file 1 [file downloadSupplementary]

## Sheet: Table SVIII
Table SVIII. Differentially expressed genes in low-miR150 group compared with high-miR150 group.
Name	Low-miR150		High-miR150		log(fold-change)	t	P-value	False discovery rate
	Mean	SD	Mean	SD
BTLA	2.87196	1.33812	5.43699	1.39357	-2.56503	-29.1892	1.81122e-138	3.19752e-134
CCR7	5.32029	1.39537	7.85779	1.31091	-2.5375	-28.6342	1.53515e-134	1.35508e-130
FCRL3	2.43111	1.56044	5.36981	1.65368	-2.9387	-28.5049	1.25995e-133	7.41439e-130
TRAT1	2.92329	1.51637	5.58232	1.3424	-2.65903	-28.0933	1.01226e-130	4.4676e-127
GPR171	3.31653	1.38274	5.70154	1.21483	-2.38501	-27.6893	7.08213e-128	2.50056e-124
SH2D1A	4.20654	1.56947	6.82806	1.2845	-2.62151	-27.3177	2.88773e-125	8.49668e-122
SLAMF6	5.09826	1.49001	7.60633	1.2795	-2.50806	-27.1908	2.24166e-124	5.65346e-121
PYHIN1	3.46068	1.48481	5.9557	1.2846	-2.49503	-27.0899	1.14304e-123	2.5224e-120
TCL1A	1.70425	1.58759	4.88416	2.20336	-3.17992	-27.071	1.54942e-123	2.73535e-120
ZNF831	3.54515	1.51784	6.07896	1.28365	-2.53382	-27.0751	1.45021e-123	2.73535e-120
ITK	5.01034	1.57013	7.57804	1.25086	-2.5677	-26.9213	1.73331e-122	2.78181e-119
SIRPG	3.67369	1.54035	6.2405	1.32519	-2.56682	-26.9056	2.23063e-122	3.28163e-119
IL12B	1.32421	1.07801	3.31189	1.26762	-1.98768	-26.8193	8.96282e-122	1.21715e-118
TIFAB	2.07275	1.2929	4.3592	1.37069	-2.28645	-26.7601	2.32221e-121	2.92831e-118
MS4A1	3.81668	2.18511	7.54037	2.07928	-3.72369	-26.735	3.47956e-121	4.09521e-118
CD5	5.52632	1.50343	7.9508	1.19718	-2.42448	-26.5494	6.88343e-120	7.59501e-117
SLAMF1	3.71523	1.49857	6.14498	1.23305	-2.42975	-26.4812	2.05734e-119	2.13649e-116
SLA2	4.38965	1.32635	6.58079	1.18174	-2.19113	-26.4159	5.87369e-119	5.76079e-116
CD40LG	3.15349	1.47418	5.53504	1.21542	-2.38156	-26.3718	1.19219e-118	1.10773e-115
SCML4	3.34699	1.43346	5.69863	1.26663	-2.35164	-26.2951	4.08383e-118	3.6048e-115
PLA2G2D	3.55796	1.97125	6.93506	2.01372	-3.3771	-26.2665	6.45451e-118	5.42609e-115
TBX21	3.10715	1.31987	5.31727	1.26195	-2.21013	-26.224	1.27565e-117	1.02365e-114
LY9	3.99126	1.50647	6.43554	1.32453	-2.44428	-26.0432	2.31035e-116	1.77335e-113
LOC100188949	2.09123	1.07726	3.90152	1.07208	-1.81029	-25.9778	6.57173e-116	4.83405e-113
SELL	6.93019	1.29868	9.1233	1.31786	-2.1931	-25.943	1.14736e-115	8.10218e-113
UBASH3A	3.38565	1.48915	5.77704	1.29718	-2.39139	-25.8414	5.81656e-115	3.94944e-112
LTA	2.85707	1.28318	5.00649	1.29573	-2.14942	-25.7755	1.66584e-114	1.08921e-111
PRKCB	5.83347	1.40204	8.07514	1.22791	-2.24168	-25.6895	6.56872e-114	4.14158e-111
CXCR5	3.16873	1.35384	5.64237	1.72915	-2.47363	-25.6654	9.65491e-114	5.87751e-111
CD247	5.15729	1.41012	7.37802	1.17257	-2.22072	-25.6519	1.19834e-113	7.05181e-111
C5orf20	2.75333	1.45343	5.13359	1.39586	-2.38026	-25.6139	2.19629e-113	1.25075e-110
IL2RG	7.76027	1.33679	9.88156	1.155	-2.12129	-25.5891	3.25946e-113	1.7982e-110
SAMD3	3.64787	1.36197	5.79579	1.15459	-2.14792	-25.5602	5.16758e-113	2.7645e-110
LCK	6.00434	1.47727	8.30147	1.20279	-2.29714	-25.4628	2.43538e-112	1.26454e-109
CD3E	6.66755	1.60525	9.11441	1.20074	-2.44686	-25.4541	2.79769e-112	1.41115e-109
TIGIT	4.72644	1.64592	7.26657	1.3056	-2.54013	-25.4326	3.94049e-112	1.93237e-109
ICOS	3.62449	1.57807	6.09979	1.35369	-2.4753	-25.3462	1.55702e-111	7.42909e-109
CD48	7.14793	1.1361	8.97978	1.07442	-1.83185	-25.3325	1.93794e-111	9.00328e-109
CD2	6.75792	1.52045	9.06809	1.15055	-2.31017	-25.3076	2.87684e-111	1.30225e-108
CD96	5.60684	1.58175	7.97972	1.1666	-2.37288	-25.1265	5.10787e-110	2.25436e-107
PTPN7	6.41021	1.13041	8.23273	1.1081	-1.82253	-25.0475	1.78648e-109	7.69231e-107
NCR3	1.86731	1.17935	3.91281	1.43109	-2.0455	-24.9057	1.68936e-108	7.10096e-106
CD3G	3.53234	1.63384	5.9973	1.29757	-2.46496	-24.8553	3.75076e-108	1.5399e-105
FCRL1	1.16854	1.25642	3.65385	2.00566	-2.48532	-24.8514	3.98849e-108	1.60029e-105
CD3D	5.18126	1.61686	7.60297	1.2547	-2.42171	-24.8086	7.84347e-108	3.07708e-105
KLRK1	4.7601	1.4077	6.94296	1.25499	-2.18286	-24.7925	1.01287e-107	3.88723e-105
JAK3	7.03023	1.08917	8.75856	1.049	-1.72833	-24.7892	1.06612e-107	4.00452e-105
GFI1	3.83695	1.18333	5.66508	1.04982	-1.82813	-24.7298	2.72453e-107	1.00206e-104
KIAA0748	3.84537	1.35162	5.91809	1.18143	-2.07272	-24.6517	9.36286e-107	3.37331e-104
CNR2	1.0048	1.02936	2.98489	1.5865	-1.98009	-24.6315	1.28684e-106	4.4545e-104
PLAC8	3.53293	1.53893	5.9178	1.40094	-2.38487	-24.6317	1.28279e-106	4.4545e-104
SP140	5.32619	1.15258	7.18094	1.18451	-1.85474	-24.6126	1.73418e-106	5.88753e-104
C16orf54	4.91802	1.24219	6.85307	1.16455	-1.93506	-24.5416	5.31535e-106	1.77051e-103
GPR18	2.97763	1.10921	4.8413	1.30322	-1.86367	-24.4478	2.33225e-105	7.62472e-103
CTLA4	3.80723	1.52952	6.10671	1.29463	-2.29947	-24.3782	6.96761e-105	2.19654e-102
SIT1	4.05965	1.49847	6.33418	1.31457	-2.27453	-24.3787	6.91702e-105	2.19654e-102
SPOCK2	7.98479	1.28452	9.9319	1.13667	-1.94711	-24.284	3.06882e-104	9.50472e-102
GZMK	5.2484	1.87148	7.95463	1.36627	-2.70623	-24.2742	3.57552e-104	1.08832e-101
CD19	1.9467	1.77786	5.01715	2.2769	-3.07045	-24.2339	6.74105e-104	2.01706e-101
CCL5	8.30085	1.3908	10.3967	1.21823	-2.09587	-24.2115	9.57568e-104	2.81749e-101
IKZF1	7.48794	1.06656	9.13924	1.02947	-1.6513	-24.1692	1.86178e-103	5.38818e-101
CXCR3	4.9192	1.47152	7.14342	1.32378	-2.22423	-24.106	5.0142e-103	1.42775e-100
ZAP70	4.86525	1.55712	7.24866	1.46415	-2.38341	-24.0972	5.75731e-103	1.61333e-100
CD8A	6.58267	1.3604	8.64586	1.24841	-2.0632	-24.0472	1.26224e-102	3.4818e-100
ZNF80	1.48089	1.07123	3.24781	1.25919	-1.76692	-23.9949	2.8613e-102	7.77129e-100
CD52	7.26744	1.31181	9.26876	1.25143	-2.00133	-23.9089	1.10039e-101	2.94337e-99
IL18RAP	2.34535	1.19395	4.21588	1.23626	-1.87053	-23.9016	1.23384e-101	3.25107e-99
ACAP1	5.58858	1.48559	7.81357	1.34705	-2.22499	-23.8321	3.65664e-101	9.49328e-99
NLRC3	6.36182	0.728806	7.60666	0.947218	-1.24484	-23.7853	7.59965e-101	1.94441e-98
ZBED2	2.62632	1.51968	5.00569	1.59877	-2.37937	-23.7595	1.13739e-100	2.86851e-98
CD27	5.67303	1.55281	7.9576	1.33552	-2.28457	-23.7569	1.18306e-100	2.94164e-98
BLK	1.96936	1.60392	4.70562	2.09038	-2.73627	-23.7493	1.33237e-100	3.2669e-98
CD6	6.25161	1.33256	8.24473	1.22328	-1.99311	-23.7128	2.3562e-100	5.69813e-98
SPIB	3.01162	1.80644	5.93148	2.08624	-2.91986	-23.6898	3.37323e-100	8.04744e-98
PRKCQ	3.84678	1.54216	6.06052	1.22834	-2.21373	-23.6318	8.33724e-100	1.96247e-97
EOMES	3.49183	1.56807	5.82272	1.42724	-2.3309	-23.6283	8.80557e-100	2.04544e-97
FCRLA	2.94269	1.60522	5.51673	1.82968	-2.57404	-23.6221	9.70171e-100	2.22434e-97
TRAF3IP3	6.22928	1.05287	7.85803	1.08995	-1.62875	-23.5989	1.39302e-99	3.15287e-97
TMC8	7.04829	0.99444	8.63094	1.12208	-1.58266	-23.5262	4.32329e-99	9.66118e-97
THEMIS	3.63491	1.5394	5.84733	1.26461	-2.21242	-23.483	8.4651e-99	1.86804e-96
CXCL9	8.49459	2.0728	11.472	1.70839	-2.97743	-23.4551	1.30624e-98	2.84696e-96
CXCR6	5.01741	1.37553	7.0165	1.20391	-1.99909	-23.3549	6.20247e-98	1.33535e-95
GZMB	3.90515	1.75921	6.57969	1.79592	-2.67454	-23.3135	1.17804e-97	2.50569e-95
NKG7	5.43114	1.47563	7.61612	1.39061	-2.18498	-23.2944	1.58573e-97	3.33267e-95
XCL2	2.3463	1.2924	4.315	1.33517	-1.9687	-23.2596	2.72147e-97	5.65232e-95
LAMP3	6.15355	1.66515	8.5422	1.4125	-2.38865	-23.2491	3.20071e-97	6.57039e-95
SNX20	4.71564	1.17364	6.45816	1.12321	-1.74251	-23.2419	3.57821e-97	7.26088e-95
S1PR4	4.05285	1.30093	6.03499	1.35191	-1.98214	-23.2177	5.20727e-97	1.04465e-94
GPR174	2.3173	1.40004	4.42784	1.41035	-2.11053	-23.217	5.2683e-97	1.04502e-94
GVIN1	5.33669	1.34057	7.29661	1.23576	-1.95992	-23.1505	1.47531e-96	2.89391e-94
ARHGAP25	7.4954	0.832635	8.76243	0.875554	-1.26703	-23.0781	4.52814e-96	8.78458e-94
TTC24	0.635005	0.748187	2.10959	1.34875	-1.47459	-23.0477	7.24268e-96	1.38981e-93
SLFN12L	2.68612	1.20657	4.46993	1.17799	-1.78381	-22.9994	1.52763e-95	2.89986e-93
TBC1D10C	5.43328	1.32613	7.42462	1.35865	-1.99135	-22.9947	1.64408e-95	3.08773e-93
STAT4	4.76894	1.36937	6.66868	1.06958	-1.89974	-22.9412	3.75436e-95	6.97679e-93
GZMA	5.44165	1.5553	7.61969	1.26474	-2.17805	-22.9396	3.84933e-95	7.07876e-93
CRTAM	3.56055	1.24101	5.4097	1.25329	-1.84915	-22.9266	4.70508e-95	8.56325e-93
PRF1	5.48323	1.35363	7.45326	1.27582	-1.97003	-22.893	7.89787e-95	1.42274e-92
BANK1	3.6622	1.55154	6.06586	1.75719	-2.40366	-22.8781	9.95082e-95	1.77446e-92
P2RY8	6.2509	0.957306	7.73207	1.09783	-1.48117	-22.7269	1.02195e-93	1.80414e-91
CD7	5.08163	1.42273	7.1602	1.39148	-2.07857	-22.7187	1.15821e-93	2.02445e-91
PDCD1	3.61233	1.47644	5.78002	1.4722	-2.16769	-22.6892	1.82552e-93	3.15958e-91
CLEC4C	0.453334	0.766791	1.99757	1.48101	-1.54423	-22.5496	1.55895e-92	2.672e-90
FCRL2	1.61179	1.43199	3.91657	1.84192	-2.30478	-22.5381	1.8593e-92	3.15617e-90
LGALS2	2.94675	1.71053	5.34072	1.49364	-2.39398	-22.5086	2.92425e-92	4.91665e-90
SPN	6.80052	1.14077	8.4105	1.02672	-1.60998	-22.4991	3.38262e-92	5.63366e-90
IDO2	0.806335	0.905167	2.25505	1.15532	-1.44872	-22.4789	4.61223e-92	7.60975e-90
PTPRCAP	6.15597	1.43884	8.27106	1.49964	-2.11508	-22.3793	2.12111e-91	3.46724e-89
FOXP3	5.39693	1.21619	7.11083	1.12355	-1.7139	-22.2983	7.31638e-91	1.18498e-88
SASH3	7.68722	0.988011	9.12312	1.00924	-1.4359	-22.2696	1.13413e-90	1.82018e-88
IPCEF1	5.01845	1.08327	6.57382	1.0709	-1.55537	-22.2443	1.6707e-90	2.65717e-88
TREML2	1.71984	1.04945	3.45287	1.46767	-1.73303	-22.2289	2.11197e-90	3.329e-88
PARP15	3.07179	1.25933	4.94917	1.39331	-1.87738	-22.2085	2.88644e-90	4.50949e-88
MAP4K1	5.96957	1.21575	7.7161	1.2113	-1.74652	-22.2027	3.15362e-90	4.88369e-88
PAX5	1.38716	1.50514	3.83476	2.048	-2.4476	-22.1878	3.9581e-90	6.0762e-88
CD38	3.70914	1.84794	6.29624	1.71209	-2.5871	-22.1403	8.16605e-90	1.24279e-87
PTPRC	8.80706	1.31997	10.6295	1.17944	-1.8224	-22.0589	2.82221e-89	4.2584e-87
TXK	2.19308	1.02216	3.78457	1.28708	-1.5915	-22.0026	6.64318e-89	9.93888e-87
CCL19	5.58123	2.66022	8.9921	1.74618	-3.41087	-21.9676	1.13179e-88	1.67905e-86
CCR5	6.86758	1.23013	8.54244	1.0751	-1.67486	-21.8858	3.91954e-88	5.76629e-86
IL12RB1	4.54324	1.21237	6.25798	1.20777	-1.71474	-21.8602	5.77983e-88	8.43281e-86
KLRB1	3.88627	1.67581	6.05799	1.20125	-2.17172	-21.8343	8.56227e-88	1.239e-85
TRAF1	7.45763	0.878607	8.71357	0.909156	-1.25594	-21.8032	1.37288e-87	1.97047e-85
CD226	3.70006	1.16499	5.30867	1.09483	-1.6086	-21.7356	3.82026e-87	5.43895e-85
SLAMF7	7.06624	1.46214	9.07416	1.35652	-2.00791	-21.7057	6.01212e-87	8.49103e-85
CD8B	4.61901	1.62332	6.77812	1.34053	-2.15911	-21.7048	6.09076e-87	8.53383e-85
IRF4	5.11929	1.74023	7.44932	1.47699	-2.33003	-21.6976	6.78879e-87	9.43696e-85
CD1B	1.31478	1.33534	3.42001	1.7962	-2.10523	-21.6267	1.98409e-86	2.7365e-84
BIN2	6.84115	0.99261	8.22883	0.987769	-1.38768	-21.6095	2.57492e-86	3.52384e-84
CST7	5.64871	1.36485	7.46618	1.16187	-1.81747	-21.5586	5.54748e-86	7.53348e-84
AMICA1	6.11518	1.3984	7.9364	1.10117	-1.82122	-21.4964	1.41871e-85	1.9119e-83
C11orf21	2.42423	1.17909	4.11323	1.28021	-1.689	-21.4879	1.61165e-85	2.15546e-83
MAL	2.70286	1.55188	4.8208	1.46505	-2.11794	-21.4595	2.47435e-85	3.28437e-83
GBP5	7.10283	1.68755	9.41137	1.60588	-2.30854	-21.4588	2.49907e-85	3.29243e-83
RGL4	2.34247	1.04481	3.86243	1.19003	-1.51996	-21.4285	3.94328e-85	5.15664e-83
AKNA	8.85523	0.737275	9.92548	0.836985	-1.07025	-21.3954	6.48932e-85	8.42371e-83
CD37	7.81308	0.958368	9.21081	1.11201	-1.39773	-21.3239	1.90214e-84	2.45112e-82
IL2RB	7.37958	1.39229	9.20996	1.17978	-1.83038	-21.3099	2.34728e-84	3.00281e-82
FAM129C	1.74675	1.20129	3.7667	1.89189	-2.01995	-21.2828	3.52733e-84	4.47997e-82
FCRL6	3.0417	1.28757	4.78817	1.22723	-1.74647	-21.2624	4.78744e-84	6.03696e-82
CD28	5.20279	1.17508	6.79928	1.12883	-1.59648	-21.2431	6.39478e-84	8.00663e-82
IL7R	4.98932	1.95333	7.49412	1.52548	-2.5048	-21.2111	1.03463e-83	1.28629e-81
CCR2	5.20551	1.50807	7.15849	1.23649	-1.95298	-21.1697	1.92414e-83	2.35894e-81
FCER2	1.20004	1.43832	3.65681	2.35252	-2.45677	-21.1698	1.92089e-83	2.35894e-81
XCL1	2.32935	1.25564	4.08914	1.34315	-1.7598	-21.1391	3.03999e-83	3.70124e-81
APOBEC3H	2.41346	1.08311	3.91776	1.13489	-1.5043	-21.0992	5.52734e-83	6.68354e-81
PLEK	8.2056	1.05567	9.63549	1.0298	-1.42989	-21.0736	8.10925e-83	9.73882e-81
MIR155HG	3.56366	1.07246	5.07102	1.17744	-1.50736	-20.9952	2.61649e-82	3.12105e-80
CD53	8.90602	0.965062	10.2123	0.950079	-1.30627	-20.9945	2.64192e-82	3.13024e-80
P2RY10	4.02863	1.61086	6.0944	1.31675	-2.06577	-20.9802	3.2719e-82	3.85081e-80
CD79A	5.24813	2.15727	8.0864	1.94395	-2.83828	-20.9771	3.42767e-82	4.00743e-80
ARHGAP9	6.35899	1.09586	7.85693	1.12232	-1.49793	-20.93	6.91936e-82	7.98395e-80
FASLG	3.14854	1.39177	5.03088	1.38166	-1.88234	-20.9303	6.89238e-82	7.98395e-80
2019-09-01	6.06476	1.096	7.62523	1.25762	-1.56047	-20.9127	8.96075e-82	1.02723e-79
IL10RA	8.17594	1.03155	9.55538	0.996977	-1.37944	-20.8658	1.8002e-81	2.05037e-79
CD69	5.59419	1.45504	7.42805	1.1355	-1.83386	-20.8472	2.37486e-81	2.68755e-79
IFNG	1.24353	1.25042	3.19102	1.77039	-1.94749	-20.8414	2.59096e-81	2.91343e-79
GZMM	3.24437	1.53183	5.34311	1.60706	-2.09874	-20.8115	4.04165e-81	4.5159e-79
IDO1	5.53488	2.02472	8.20267	1.88421	-2.6678	-20.8108	4.08291e-81	4.53332e-79
CTSW	4.96175	1.62363	7.05845	1.40737	-2.0967	-20.8094	4.17354e-81	4.60498e-79
AIM2	3.47745	1.58255	5.60474	1.57991	-2.12728	-20.766	7.95341e-81	8.72108e-79
LAX1	4.09225	1.64842	6.24617	1.50535	-2.15393	-20.7508	9.96679e-81	1.08613e-78
STAP1	2.73171	1.37345	4.64398	1.521	-1.91227	-20.7359	1.24426e-80	1.34762e-78
CLEC10A	4.34793	2.01513	6.83288	1.46753	-2.48495	-20.7118	1.77993e-80	1.91603e-78
CYTIP	6.81934	1.27388	8.45283	1.09693	-1.63349	-20.6956	2.26151e-80	2.41968e-78
GRAP2	4.54858	1.28246	6.18834	1.09455	-1.63977	-20.685	2.64832e-80	2.81647e-78
IRF8	7.52084	1.08377	8.98387	1.11122	-1.46302	-20.6618	3.73453e-80	3.94787e-78
LCP2	8.02113	0.900554	9.20184	0.847425	-1.18071	-20.6222	6.72196e-80	7.06366e-78
LOC100233209	3.52122	1.23384	5.1453	1.19112	-1.62408	-20.5507	1.93633e-79	2.02272e-77
HSF5	0.909225	0.709028	1.99874	1.0099	-1.08952	-20.4852	5.10101e-79	5.29725e-77
CCR4	3.88182	1.60023	5.893	1.33836	-2.01118	-20.4434	9.46011e-79	9.76659e-77
KLHL6	6.59649	1.05495	7.98796	1.04765	-1.39147	-20.4036	1.70267e-78	1.74761e-76
CSF2RB	7.35556	1.12735	8.82259	1.07545	-1.46703	-20.3902	2.07495e-78	2.11741e-76
ARHGAP15	5.64644	1.07087	7.01256	0.955979	-1.36612	-20.3826	2.32053e-78	2.3544e-76
BIRC3	7.6998	1.30527	9.33986	1.11224	-1.64006	-20.336	4.60826e-78	4.64881e-76
GIMAP7	7.05553	1.04948	8.40781	0.978595	-1.35228	-20.3282	5.17063e-78	5.1865e-76
PIK3CD	7.7421	0.907323	8.97	0.98191	-1.2279	-20.3176	6.04266e-78	6.02696e-76
TNFRSF8	3.73261	1.15065	5.22167	1.09379	-1.48906	-20.3	7.82841e-78	7.7642e-76
POU2AF1	5.19557	2.05907	7.76444	1.72699	-2.56887	-20.2814	1.02992e-77	1.01577e-75
KCNA3	3.51923	1.43141	5.36957	1.36177	-1.85034	-20.2769	1.10045e-77	1.0793e-75
FYB	8.09698	1.11902	9.53449	1.04837	-1.43752	-20.2399	1.89683e-77	1.85009e-75
ARHGAP30	8.56814	0.836274	9.70974	0.935628	-1.1416	-20.239	1.92029e-77	1.86268e-75
IL2RA	4.11594	1.58214	6.11346	1.40364	-1.99752	-20.2154	2.71726e-77	2.62134e-75
TOX	4.64224	1.55069	6.55439	1.25716	-1.91215	-20.2139	2.77669e-77	2.66411e-75
PATL2	2.43952	1.19544	4.10079	1.40757	-1.66127	-20.2046	3.18273e-77	3.03719e-75
TNFRSF9	2.97051	1.50951	4.88923	1.37521	-1.91873	-20.1987	3.47357e-77	3.2969e-75
FUT7	2.94728	1.18667	4.61129	1.43148	-1.66401	-20.1856	4.20951e-77	3.97405e-75
CD244	2.93115	1.10414	4.40956	1.18374	-1.47842	-20.1767	4.79798e-77	4.50551e-75
GPR183	6.81563	1.25372	8.37919	1.07099	-1.56356	-20.1705	5.25194e-77	4.9057e-75
CD79B	5.24303	1.4925	7.21847	1.554	-1.97544	-20.1578	6.32726e-77	5.87903e-75
ZC3H12D	2.86258	1.05116	4.30749	1.21146	-1.44491	-20.1543	6.66301e-77	6.15858e-75
KIAA0125	2.76876	1.82576	5.21474	1.97115	-2.44598	-20.1444	7.70274e-77	7.08251e-75
HLA-DOB	4.8304	1.55294	6.81786	1.46162	-1.98746	-20.1422	7.95859e-77	7.27984e-75
PDE6G	3.15067	0.971281	4.46645	1.08083	-1.31578	-20.131	9.37055e-77	8.5272e-75
CXorf65	0.489398	0.641842	1.58539	1.1494	-1.09599	-20.0439	3.35697e-76	3.03918e-74
EVI2B	7.86942	1.07215	9.23332	1.01354	-1.36391	-19.9872	7.6954e-76	6.93135e-74
PIM2	8.43899	0.764449	9.5624	1.0546	-1.12341	-19.9037	2.60363e-75	2.33322e-73
UBD	7.55235	2.12771	10.1687	1.81613	-2.61637	-19.8993	2.77798e-75	2.47689e-73
RASAL3	6.65261	1.01113	7.99971	1.1116	-1.34709	-19.8894	3.20858e-75	2.84645e-73
GIMAP5	7.46868	1.01251	8.76901	1.00673	-1.30034	-19.8574	5.11637e-75	4.51622e-73
DTHD1	1.30375	1.12648	2.83823	1.31811	-1.53449	-19.854	5.37729e-75	4.72292e-73
FCRL5	3.71656	2.18729	6.41918	1.92152	-2.70262	-19.8412	6.48093e-75	5.66408e-73
KLRG1	4.06946	0.985705	5.36101	1.04229	-1.29155	-19.8388	6.70908e-75	5.83459e-73
LAT	6.13188	1.13992	7.59385	1.1346	-1.46197	-19.8267	8.00173e-75	6.92464e-73
LRMP	5.3915	1.11963	6.85041	1.16861	-1.45891	-19.8228	8.46477e-75	7.28961e-73
TLR10	3.84522	1.41337	5.6636	1.42518	-1.81838	-19.8082	1.04824e-74	8.98331e-73
VPREB3	2.33163	1.36228	4.27176	1.78104	-1.94012	-19.796	1.25145e-74	1.0673e-72
C2orf89	3.51917	1.37787	5.24471	1.27908	-1.72554	-19.7897	1.37202e-74	1.1645e-72
TAGAP	6.65705	1.15276	8.10194	1.07277	-1.44489	-19.7887	1.39107e-74	1.17502e-72
DOK2	6.05103	1.1967	7.54825	1.10775	-1.49722	-19.7845	1.47865e-74	1.24305e-72
HCST	6.13498	1.10323	7.55631	1.1235	-1.42133	-19.7649	1.9681e-74	1.63891e-72
KLRD1	3.80092	1.36689	5.50392	1.2629	-1.703	-19.7156	4.02874e-74	3.33912e-72
BCL11B	5.53767	1.67514	7.50051	1.22111	-1.96283	-19.6745	7.31377e-74	6.00546e-72
LTB	5.44868	1.79786	7.75536	1.87828	-2.30668	-19.5192	6.93508e-73	5.66814e-71
WAS	6.89934	0.931132	8.10573	1.00466	-1.20639	-19.4734	1.34262e-72	1.08727e-70
C8orf80	2.47653	1.43006	4.3287	1.5494	-1.85216	-19.4468	1.97309e-72	1.58331e-70
GBP4	8.87868	1.27806	10.464	1.21885	-1.58537	-19.4412	2.13687e-72	1.70699e-70
RASGRP2	4.88272	1.2819	6.58889	1.49718	-1.70617	-19.4158	3.08502e-72	2.45329e-70
SLA	7.90713	1.01134	9.14361	0.93199	-1.23648	-19.3548	7.43409e-72	5.88527e-70
TNFRSF1B	8.97568	0.908798	10.1066	0.888733	-1.13087	-19.34	9.19684e-72	7.24826e-70
RAC2	8.84045	0.985505	10.0786	0.9959	-1.23819	-19.3218	1.19482e-71	9.37484e-70
MEI1	4.57092	1.26119	6.14931	1.27159	-1.57839	-19.2673	2.61387e-71	2.04183e-69
TMIGD2	1.33808	1.02489	2.77805	1.38133	-1.43997	-19.2508	3.31514e-71	2.57821e-69
TNFRSF13B	1.68562	1.4611	3.6646	1.82323	-1.97898	-19.2221	5.00749e-71	3.87729e-69
FGD2	6.11229	1.02299	7.39041	1.03553	-1.27812	-19.2045	6.4443e-71	4.96802e-69
TNFAIP3	8.88531	0.972345	10.0398	0.832065	-1.15453	-19.1881	8.15456e-71	6.25916e-69
APOBEC3G	7.33287	1.08029	8.64109	0.993082	-1.30821	-19.1864	8.35514e-71	6.38535e-69
FAM65B	6.06509	1.33479	7.72073	1.33927	-1.65564	-19.1277	1.93644e-70	1.47353e-68
CXCL13	5.85533	2.76601	9.05858	2.17563	-3.20325	-19.1265	1.97089e-70	1.49331e-68
FAM78A	6.99118	0.803094	8.03169	0.90898	-1.04051	-19.1221	2.0971e-70	1.58214e-68
BEND4	0.961066	1.09149	2.46547	1.43741	-1.5044	-19.091	3.27453e-70	2.45994e-68
CORO1A	9.13371	1.02641	10.4748	1.19345	-1.34114	-19.0902	3.30965e-70	2.47578e-68
GNLY	4.60375	1.66034	6.61951	1.57005	-2.01576	-19.0811	3.77084e-70	2.80888e-68
GIMAP4	8.65144	0.838613	9.69542	0.855884	-1.04398	-19.0754	4.09238e-70	3.03558e-68
MCART6	3.1837	1.05601	4.46085	0.98623	-1.27715	-19.0714	4.3343e-70	3.20158e-68
SRGN	9.4995	0.96581	10.6573	0.87696	-1.15783	-19.0585	5.21234e-70	3.83411e-68
CCL17	2.45342	1.54933	4.37765	1.58387	-1.92424	-19.035	7.28542e-70	5.3368e-68
KLRC1	1.8107	1.24806	3.46505	1.51503	-1.65435	-19.0321	7.59306e-70	5.53917e-68
PVRIG	5.25824	1.04831	6.54704	1.05504	-1.2888	-18.9343	3.06702e-69	2.2282e-67
FAM26F	5.91887	1.23337	7.44569	1.27047	-1.52682	-18.9204	3.73841e-69	2.70483e-67
LYZ	10.5102	1.51156	12.3417	1.46018	-1.83142	-18.9159	3.9829e-69	2.86997e-67
CR2	2.18414	2.24654	5.16447	2.78254	-2.98032	-18.8913	5.65476e-69	4.0581e-67
WDFY4	6.85559	1.29338	8.40114	1.2059	-1.54556	-18.8578	9.10545e-69	6.508e-67
KCNJ10	3.11833	1.24293	4.77219	1.55898	-1.65387	-18.8395	1.18087e-68	8.40608e-67
CD1E	3.62022	1.7541	5.70941	1.62698	-2.08919	-18.8289	1.37328e-68	9.7365e-67
SLAMF8	7.77592	1.20002	9.1971	1.09397	-1.42117	-18.8118	1.74994e-68	1.23574e-66
CIITA	7.32305	1.22868	8.78835	1.1472	-1.4653	-18.8109	1.77346e-68	1.24736e-66
NLRC5	8.71768	1.0115	9.92849	0.962051	-1.2108	-18.7708	3.13202e-68	2.19415e-66
PTPN22	5.53485	1.25075	6.99746	1.10486	-1.46261	-18.7425	4.67639e-68	3.26312e-66
FCN1	3.78024	1.80515	5.86441	1.52452	-2.08417	-18.7346	5.22994e-68	3.63501e-66
PSTPIP1	5.18873	1.42208	6.85879	1.28436	-1.67006	-18.7077	7.66285e-68	5.3051e-66
PPP1R16B	6.73882	1.2753	8.25065	1.19022	-1.51183	-18.702	8.3017e-68	5.72493e-66
TNFRSF13C	1.77611	1.17077	3.32417	1.4742	-1.54806	-18.6883	1.00775e-67	6.9225e-66
CXCR2P1	3.22688	2.04128	5.69107	2.03382	-2.46419	-18.6635	1.43064e-67	9.78934e-66
ADAMDEC1	5.23485	2.09035	7.6471	1.80146	-2.41225	-18.6271	2.39506e-67	1.62624e-65
KIR3DL2	0.759679	0.893793	2.09055	1.44	-1.33087	-18.6051	3.26677e-67	2.20964e-65
GAB3	5.83451	0.868729	6.87276	0.847442	-1.03825	-18.588	4.15686e-67	2.79421e-65
ITGAL	8.29689	1.20923	9.69116	1.04551	-1.39427	-18.5879	4.16267e-67	2.79421e-65
DOCK2	7.9607	1.14344	9.29412	1.03126	-1.33341	-18.5796	4.6803e-67	3.12978e-65
SAMSN1	6.76453	1.03409	7.94749	0.876524	-1.18296	-18.5348	8.80521e-67	5.86593e-65
GBP1	9.51949	1.25017	11.0259	1.26891	-1.50642	-18.5094	1.26052e-66	8.36588e-65
NCKAP1L	8.25528	1.07472	9.50849	0.982285	-1.25321	-18.506	1.32192e-66	8.74054e-65
IL21R	5.53835	1.41929	7.19435	1.30142	-1.65599	-18.5052	1.33609e-66	8.80123e-65
CXCL11	6.17203	1.87299	8.34915	1.69641	-2.17712	-18.5047	1.34554e-66	8.83055e-65
IL18R1	4.83704	1.18247	6.16856	0.949616	-1.33152	-18.4965	1.50955e-66	9.87023e-65
CXCL10	8.07744	1.72075	10.1151	1.66036	-2.03768	-18.4959	1.52357e-66	9.92516e-65
SERPINB9	7.61393	0.935682	8.69161	0.820206	-1.07768	-18.4911	1.63015e-66	1.05804e-64
CD4	9.69259	0.928001	10.7957	0.907058	-1.10307	-18.478	1.96097e-66	1.26809e-64
SLC12A3	1.48798	1.241	3.04314	1.41094	-1.55516	-18.4751	2.04206e-66	1.31571e-64
CLEC17A	1.3894	1.26969	3.07322	1.65174	-1.68382	-18.4745	2.05924e-66	1.32196e-64
ITGB7	6.56062	1.18277	7.97901	1.19479	-1.41839	-18.4491	2.94259e-66	1.88219e-64
SH2D2A	5.06241	1.47464	6.72131	1.19575	-1.6589	-18.4395	3.3687e-66	2.14697e-64
CLIC2	7.3776	0.892757	8.39295	0.757672	-1.01535	-18.4161	4.68171e-66	2.97305e-64
ZNF683	4.11069	1.5815	5.94847	1.48921	-1.83778	-18.2864	2.88369e-65	1.82468e-63
ASB2	3.98713	1.27052	5.45708	1.18397	-1.46995	-18.2604	4.14743e-65	2.61495e-63
CD200R1	3.61925	1.20812	5.01267	1.11911	-1.39343	-18.2354	5.88376e-65	3.69651e-63
ZBTB32	2.45717	1.00693	3.72051	1.18622	-1.26334	-18.2341	5.99096e-65	3.75051e-63
GMFG	7.4751	0.861628	8.51078	0.911602	-1.03568	-18.1914	1.08835e-64	6.78931e-63
HCLS1	8.9446	0.932734	10.0531	0.955593	-1.10848	-18.1904	1.10359e-64	6.86016e-63
LOC400759	3.1058	1.53581	4.9127	1.52998	-1.8069	-18.1877	1.1457e-64	7.09691e-63
TNIP3	1.77084	1.4112	3.50824	1.59722	-1.7374	-18.1845	1.19829e-64	7.39673e-63
C17orf87	3.80089	1.05005	5.05663	1.09857	-1.25574	-18.1764	1.34172e-64	8.25323e-63
RGS18	4.17294	1.17343	5.47286	0.950921	-1.29992	-18.1567	1.76477e-64	1.08178e-62
CFP	3.78826	1.25451	5.28567	1.31153	-1.4974	-18.1503	1.93134e-64	1.17979e-62
SSTR3	0.548795	0.668775	1.55134	1.13965	-1.00255	-18.1289	2.60106e-64	1.58342e-62
RUNX3	7.51288	1.27645	8.95524	1.13333	-1.44235	-18.0855	4.76177e-64	2.88881e-62
RHOF	6.10974	1.4409	7.7101	1.20185	-1.60036	-18.0773	5.33648e-64	3.22637e-62
CLECL1	2.71883	1.12629	4.02481	1.09272	-1.30598	-18.0733	5.63809e-64	3.39709e-62
CR1	3.69031	1.67188	5.62811	1.62262	-1.9378	-18.07	5.90435e-64	3.54542e-62
GP1BA	3.03957	1.27738	4.61134	1.47236	-1.57178	-18.0441	8.46248e-64	5.06429e-62
ZBP1	4.41657	1.69142	6.33602	1.54272	-1.91945	-18.0284	1.05215e-63	6.25409e-62
INPP5D	8.31894	0.919753	9.39339	0.920564	-1.07445	-18.0205	1.17469e-63	6.95903e-62
CARD11	6.20461	1.20461	7.61529	1.21759	-1.41068	-18.0129	1.30481e-63	7.70407e-62
FMNL1	8.59819	0.860071	9.60592	0.871349	-1.00774	-17.9993	1.57653e-63	9.27736e-62
GPR114	3.94309	1.5424	5.67531	1.36848	-1.73222	-17.9814	2.02006e-63	1.18479e-61
CD1C	3.70159	1.8325	5.73517	1.55804	-2.03358	-17.9758	2.18465e-63	1.27708e-61
LAG3	5.13364	1.47935	6.90332	1.60027	-1.76969	-17.9726	2.284e-63	1.33075e-61
ABCD2	3.16498	1.49102	4.83212	1.3131	-1.66714	-17.9388	3.65104e-63	2.11329e-61
BTK	6.83573	0.948363	7.92347	0.910782	-1.08773	-17.9297	4.14085e-63	2.38897e-61
AOAH	6.12189	1.34493	7.60605	1.13163	-1.48417	-17.9198	4.74674e-63	2.72961e-61
KIR2DL4	0.904852	1.04628	2.32679	1.52535	-1.42193	-17.9175	4.90085e-63	2.80908e-61
EBI3	4.57766	1.25622	5.97985	1.10703	-1.40219	-17.9019	6.08116e-63	3.47205e-61
RCSD1	7.68618	0.980701	8.81868	0.967179	-1.1325	-17.9017	6.09683e-63	3.47205e-61
TNFSF14	1.84661	1.14325	3.21316	1.25248	-1.36655	-17.8708	9.34456e-63	5.30446e-61
CCL13	2.8678	1.81235	4.92893	1.73657	-2.06114	-17.8025	2.40345e-62	1.35995e-60
INSL3	1.204	0.92656	2.31131	1.02661	-1.10731	-17.7868	2.98473e-62	1.6781e-60
PDCD1LG2	5.52264	1.1927	6.8279	1.01262	-1.30526	-17.7274	6.76104e-62	3.78919e-60
TNFRSF17	2.92172	1.96498	5.12432	1.82946	-2.2026	-17.7017	9.63672e-62	5.38376e-60
CLEC12A	3.18225	1.42005	4.76974	1.31099	-1.58748	-17.6949	1.0578e-61	5.89099e-60
IL16	8.2522	0.961209	9.3593	0.975879	-1.1071	-17.6846	1.21809e-61	6.7623e-60
GZMH	3.89695	1.54187	5.62413	1.43956	-1.72718	-17.6728	1.43285e-61	7.92964e-60
IKZF3	3.55921	1.76508	5.54358	1.67326	-1.98437	-17.6564	1.79408e-61	9.89769e-60
XCR1	1.13678	1.026	2.40254	1.26507	-1.26576	-17.5929	4.29371e-61	2.36141e-59
PLCXD2	3.90611	1.24079	5.26674	1.093	-1.36063	-17.589	4.52351e-61	2.48006e-59
POU2F2	5.85019	0.984317	7.02303	1.11513	-1.17284	-17.5861	4.71134e-61	2.57505e-59
CCR8	2.53085	1.54309	4.2167	1.34423	-1.68585	-17.5808	5.06791e-61	2.76139e-59
HLA-DRA	13.0944	1.06418	14.263	0.951442	-1.16863	-17.5381	9.09353e-61	4.92445e-59
CD72	5.58454	0.981269	6.75623	1.13145	-1.1717	-17.5025	1.47988e-60	7.96517e-59
LILRA4	3.52166	1.53611	5.26056	1.53211	-1.73891	-17.493	1.68424e-60	9.03754e-59
FGR	6.77249	0.978079	7.85873	0.917931	-1.08624	-17.485	1.87786e-60	1.0046e-58
LCP1	11.0341	1.04416	12.1638	0.904537	-1.12966	-17.4285	4.06444e-60	2.16125e-58
LOC96610	11.821	2.04657	14.13	2.05129	-2.30896	-17.4084	5.34074e-60	2.8314e-58
ARRDC5	1.36337	0.861684	2.422	1.08135	-1.05864	-17.3827	7.58627e-60	4.00982e-58
BCL2A1	5.15492	1.42621	6.76515	1.44635	-1.61023	-17.3498	1.18761e-59	6.25853e-58
MPEG1	8.77709	1.06393	9.96631	1.04654	-1.18922	-17.3445	1.27611e-59	6.70492e-58
HLA-DMB	9.38508	0.988166	10.4841	0.961304	-1.09907	-17.3178	1.83307e-59	9.60267e-58
KIF21B	6.63299	1.106	7.85541	1.05911	-1.22241	-17.2975	2.41747e-59	1.26266e-57
HSD11B1	4.42818	1.52671	6.04704	1.26542	-1.61886	-17.2869	2.79235e-59	1.45416e-57
CTSS	10.19	0.987556	11.3033	1.0194	-1.1133	-17.2127	7.63403e-59	3.96386e-57
TLR8	4.82623	1.36953	6.32728	1.31192	-1.50105	-17.1551	1.66329e-58	8.61107e-57
PARVG	7.28623	0.943864	8.35337	0.992481	-1.06714	-17.151	1.7599e-58	9.08456e-57
LIMD2	7.85628	1.10764	9.10743	1.16527	-1.25115	-17.1361	2.15097e-58	1.10709e-56
WNT10A	3.59103	1.56128	5.3033	1.5092	-1.71227	-17.119	2.71146e-58	1.39152e-56
PNOC	2.28646	1.45791	3.99293	1.70161	-1.70647	-17.081	4.52418e-58	2.31507e-56
P2RY14	4.49855	1.00671	5.577	0.908383	-1.07845	-17.0625	5.80979e-58	2.96434e-56
STX11	6.1785	0.965182	7.20188	0.846702	-1.02338	-17.0203	1.02585e-57	5.2191e-56
TCF7	7.58703	1.17543	8.82766	1.01727	-1.24062	-17.0101	1.17591e-57	5.96537e-56
MYO1G	6.64385	1.17346	7.92528	1.14279	-1.28143	-17.0013	1.3247e-57	6.70093e-56
CCL4	6.01188	1.20576	7.31196	1.12872	-1.30008	-16.9936	1.4683e-57	7.40613e-56
TLR9	4.06275	1.02191	5.27921	1.26384	-1.21646	-16.9533	2.52331e-57	1.26913e-55
GPR55	2.75238	1.44173	4.35464	1.50921	-1.60226	-16.8936	5.62426e-57	2.81277e-55
CD1D	4.62243	0.973962	5.68865	0.977697	-1.06622	-16.8724	7.46577e-57	3.72318e-55
SLCO5A1	2.26703	1.42971	3.81588	1.39706	-1.54885	-16.8512	9.91826e-57	4.93231e-55
RAB33A	3.62127	0.95045	4.65248	0.952797	-1.03122	-16.729	5.06786e-56	2.51315e-54
MCOLN2	5.2107	1.24833	6.49231	1.03632	-1.28162	-16.7277	5.15732e-56	2.55035e-54
CLEC4E	3.43328	1.64824	5.20623	1.62542	-1.77295	-16.6843	9.19967e-56	4.53662e-54
ANKRD55	1.59899	1.12013	2.80665	1.12439	-1.20766	-16.6204	2.15059e-55	1.05462e-53
TSPAN32	2.72647	1.14126	4.01804	1.32544	-1.29157	-16.5443	5.89242e-55	2.8657e-53
CCDC69	7.98552	1.11754	9.13065	0.964337	-1.14514	-16.5262	7.49704e-55	3.63607e-53
TFEC	6.57841	1.14841	7.78267	1.08473	-1.20426	-16.4815	1.35363e-54	6.52922e-53
RLTPR	4.48076	1.91442	6.41393	1.59525	-1.93317	-16.4426	2.26191e-54	1.08806e-52
FERMT3	8.12557	0.981138	9.18632	1.02696	-1.06075	-16.4281	2.73874e-54	1.31385e-52
C1orf38	7.91421	0.965566	8.94509	0.978416	-1.03088	-16.4034	3.79063e-54	1.81354e-52
AGAP2	6.10283	1.05145	7.21775	1.05147	-1.11492	-16.3654	6.25261e-54	2.98334e-52
SOCS1	5.17786	1.2565	6.47291	1.14912	-1.29505	-16.3574	6.94461e-54	3.30458e-52
NCF1	5.93518	1.19018	7.23096	1.28834	-1.29578	-16.35	7.65812e-54	3.63431e-52
CXorf21	5.10547	1.07065	6.20148	0.96636	-1.09601	-16.3049	1.38455e-53	6.4835e-52
HLA-DOA	8.49628	1.16651	9.69622	1.07175	-1.19994	-16.302	1.43735e-53	6.71297e-52
CCDC141	2.175	1.05998	3.29718	1.07192	-1.12218	-16.2792	1.9401e-53	9.03707e-52
LILRB2	6.26934	1.11703	7.4302	1.06709	-1.16086	-16.2766	2.00596e-53	9.31929e-52
CECR1	9.58771	1.11996	10.7109	0.944396	-1.12317	-16.2726	2.11458e-53	9.79812e-52
TAP1	10.8891	1.04935	12.0147	1.10807	-1.1256	-16.2504	2.82737e-53	1.30325e-51
DAZL	0.477919	0.78441	1.54464	1.3742	-1.06672	-16.1825	6.87313e-53	3.15985e-51
NAPSB	6.65525	1.52861	8.14796	1.18581	-1.49271	-16.1751	7.57589e-53	3.47389e-51
APBB1IP	7.65147	1.01469	8.66729	0.880083	-1.01581	-16.1212	1.52991e-52	6.99716e-51
SH2D1B	2.01501	1.06585	3.15263	1.13784	-1.13762	-16.1073	1.83491e-52	8.34886e-51
KBTBD8	4.76149	1.00591	5.80353	0.987046	-1.04204	-16.0857	2.4311e-52	1.10048e-50
CAMK4	3.31409	1.24503	4.55847	1.08622	-1.24438	-16.0739	2.83472e-52	1.27664e-50
RASSF4	8.49575	0.96263	9.53652	1.07841	-1.04077	-16.0255	5.31618e-52	2.37599e-50
PTGDS	6.79797	1.95741	8.73114	1.65547	-1.93317	-16.0203	5.69109e-52	2.53713e-50
FGL2	8.60952	1.23206	9.82496	1.04553	-1.21544	-15.9828	9.25491e-52	4.10518e-50
CD300LF	5.11227	1.00424	6.12805	0.935121	-1.01578	-15.9631	1.19447e-51	5.28502e-50
EPSTI1	7.41839	1.20708	8.62131	1.07227	-1.20292	-15.9469	1.47406e-51	6.50576e-50
COL4A4	4.50876	1.48583	6.0237	1.43176	-1.51494	-15.9303	1.82676e-51	8.04229e-50
PSMB9	8.44423	1.16833	9.6295	1.11176	-1.18527	-15.9092	2.40033e-51	1.0515e-49
CD74	14.5769	1.03446	15.6222	0.971394	-1.04532	-15.9079	2.43988e-51	1.06618e-49
SEL1L3	8.46603	1.31311	9.75837	1.13482	-1.29234	-15.8694	4.01662e-51	1.74654e-49
HLA-DPA1	11.8389	1.10353	12.9222	0.957564	-1.0834	-15.8097	8.66992e-51	3.74227e-49
LILRB1	6.42622	1.03868	7.48675	1.04078	-1.06053	-15.7478	1.92328e-50	8.26121e-49
P2RX5	4.85006	1.18481	6.10082	1.32184	-1.25076	-15.6762	4.82184e-50	2.05615e-48
CLEC6A	0.539251	0.848495	1.60015	1.35928	-1.06089	-15.6711	5.14348e-50	2.18277e-48
LAIR2	1.01481	1.09261	2.21648	1.35984	-1.20167	-15.6222	9.62553e-50	4.06529e-48
HLA-DPB1	11.1639	1.08705	12.2331	1.00441	-1.06915	-15.5597	2.13891e-49	8.96919e-48
APOBEC3D	5.79463	1.14527	6.89504	0.984029	-1.10041	-15.5144	3.80663e-49	1.59247e-47
CCR6	5.41807	1.29215	6.70093	1.24841	-1.28286	-15.4973	4.73531e-49	1.97163e-47
PTCRA	1.37016	0.900235	2.39721	1.23778	-1.02706	-15.4813	5.80034e-49	2.40939e-47
F5	4.64743	1.55936	6.12822	1.296	-1.48079	-15.471	6.61459e-49	2.74117e-47
CTSC	10.2444	0.98334	11.247	1.03467	-1.0026	-15.4643	7.20052e-49	2.977e-47
VNN2	4.10486	1.38713	5.46176	1.30269	-1.35689	-15.4044	1.54018e-48	6.30865e-47
CARD16	6.20518	1.20175	7.34341	1.006	-1.13823	-15.3987	1.65536e-48	6.76477e-47
NCF1B	3.90147	1.15333	5.12318	1.36053	-1.2217	-15.3889	1.87514e-48	7.62759e-47
TNFSF13B	5.76443	1.12067	6.88146	1.12402	-1.11703	-15.3699	2.38401e-48	9.65306e-47
LOC606724	4.24898	1.16181	5.44264	1.27864	-1.19366	-15.3348	3.71882e-48	1.50233e-46
DUSP2	6.88755	1.11568	7.95134	0.985832	-1.0638	-15.2789	7.52883e-48	3.02765e-46
NCF1C	4.1889	1.37899	5.59362	1.50518	-1.40472	-15.2531	1.04186e-47	4.18022e-46
CD274	4.01268	1.2333	5.2319	1.24047	-1.21922	-15.2314	1.37003e-47	5.48448e-46
IL15	5.09969	1.09394	6.12809	0.932396	-1.0284	-15.211	1.77056e-47	7.07183e-46
VAV1	7.058	1.13679	8.13845	1.0102	-1.08045	-15.2062	1.88047e-47	7.477e-46
CELF2	8.39052	1.11938	9.43068	0.926454	-1.04016	-15.1497	3.8213e-47	1.51258e-45
IL32	9.36703	1.30643	10.6157	1.2158	-1.24866	-15.0915	7.91967e-47	3.1139e-45
GPR132	6.12266	1.12199	7.15559	0.921302	-1.03293	-15.0392	1.523e-46	5.96164e-45
CCL22	6.04107	1.53224	7.43373	1.19646	-1.39266	-15.0326	1.65367e-46	6.44457e-45
AICDA	0.561762	0.725747	1.56512	1.46635	-1.00336	-15.0277	1.759e-46	6.83997e-45
HLA-DQA1	10.0503	1.39046	11.3906	1.36094	-1.34031	-14.9857	2.96966e-46	1.15223e-44
CPNE5	5.73081	1.20815	6.9019	1.20878	-1.17109	-14.9604	4.06525e-46	1.57041e-44
PDE3B	5.78911	1.60557	7.23737	1.25049	-1.44826	-14.928	6.08144e-46	2.33904e-44
CLEC9A	1.84926	1.4201	3.17975	1.28733	-1.33049	-14.9088	7.72591e-46	2.95864e-44
CSF2RA	6.56302	1.11382	7.60112	0.994213	-1.03811	-14.8926	9.44152e-46	3.60781e-44
PLA2G7	6.16451	1.5613	7.59135	1.29947	-1.42683	-14.8834	1.05894e-45	4.0377e-44
CCL18	4.69698	2.23118	6.86145	2.27653	-2.16448	-14.8803	1.09934e-45	4.17373e-44
ACSL5	8.11772	1.21412	9.20699	0.940433	-1.08927	-14.8624	1.37261e-45	5.18886e-44
ADAM6	12.898	2.39432	15.0225	1.84692	-2.12452	-14.7199	7.98254e-45	2.99201e-43
TIMD4	1.83798	1.34512	3.23576	1.69623	-1.39778	-14.6792	1.31656e-44	4.91388e-43
TOX2	4.87171	1.26217	6.01342	1.07462	-1.14172	-14.6429	2.05546e-44	7.62333e-43
COL4A3	2.22169	1.60124	3.72009	1.53821	-1.49839	-14.6356	2.24891e-44	8.32334e-43
FAIM3	7.598	1.34677	8.79393	1.09029	-1.19592	-14.56	5.67123e-44	2.08583e-42
DNAJC5B	2.95553	1.41336	4.27345	1.36786	-1.31792	-14.5488	6.50418e-44	2.38226e-42
KLRC4	0.871741	1.0231	1.98281	1.45103	-1.11107	-14.5171	9.57946e-44	3.48692e-42
CYBB	9.39742	1.20032	10.4986	1.13134	-1.10116	-14.4287	2.80913e-43	1.00593e-41
HLA-F	9.65978	1.17198	10.7728	1.23153	-1.11303	-14.4143	3.34461e-43	1.19284e-41
PPP2R2B	3.05231	1.31832	4.22101	1.11496	-1.1687	-14.3762	5.31284e-43	1.88339e-41
CLEC4D	0.822386	0.998496	1.85666	1.31542	-1.03428	-14.3436	7.88362e-43	2.78913e-41
VCAM1	8.71536	1.30457	9.86524	1.09274	-1.14988	-14.3293	9.37007e-43	3.30178e-41
TNFSF8	4.79565	1.1771	5.84563	1.03175	-1.04998	-14.3263	9.72375e-43	3.41958e-41
CDHR1	2.63437	1.67102	4.08717	1.33694	-1.4528	-14.2983	1.36304e-42	4.75554e-41
IGJ	9.31768	2.75874	11.5896	1.67008	-2.27187	-14.2974	1.37757e-42	4.79676e-41
CLEC7A	6.94636	1.19485	8.04885	1.20131	-1.10249	-14.2177	3.59975e-42	1.23879e-40
GLT1D1	1.88893	1.14993	2.95439	1.17317	-1.06546	-14.2065	4.11904e-42	1.40926e-40
C10orf128	3.12227	1.33198	4.26894	1.0641	-1.14666	-14.1604	7.17033e-42	2.43433e-40
SELP	5.52171	2.28838	7.41927	1.53047	-1.89756	-14.1592	7.26788e-42	2.46271e-40
SELE	5.98702	1.84865	7.58197	1.49342	-1.59496	-14.157	7.4706e-42	2.52655e-40
XIRP1	3.43264	1.84231	5.13829	1.89743	-1.70564	-14.1549	7.65968e-42	2.58554e-40
LILRB3	5.13825	1.15161	6.1775	1.11903	-1.03925	-14.0593	2.40479e-41	8.02536e-40
P2RX1	3.36931	1.48147	4.73908	1.55985	-1.36977	-14.0264	3.55715e-41	1.18041e-39
FPR3	8.41834	1.29862	9.53151	1.06014	-1.11317	-14.0258	3.5846e-41	1.18729e-39
PLA1A	5.01209	1.4168	6.26334	1.29368	-1.25125	-14.0241	3.65826e-41	1.20942e-39
COL19A1	0.673075	1.08308	1.8837	1.74055	-1.21062	-13.9889	5.56343e-41	1.8324e-39
COL29A1	0.849566	1.00854	2.03742	1.78495	-1.18785	-13.9337	1.07115e-40	3.50187e-39
PIK3CG	5.79499	1.34274	6.97433	1.2315	-1.17935	-13.9286	1.13856e-40	3.70851e-39
IL4I1	6.82439	1.3538	8.03756	1.32754	-1.21317	-13.9228	1.21964e-40	3.96529e-39
C4orf7	3.31439	3.31687	6.45443	3.79898	-3.14004	-13.9225	1.22463e-40	3.97419e-39
HLA-DQB1	10.1912	1.35866	11.4004	1.31248	-1.20919	-13.8935	1.72645e-40	5.57198e-39
DNASE1L3	2.85109	1.79816	4.41412	1.63492	-1.56304	-13.8224	3.99811e-40	1.28332e-38
FXYD2	1.32092	1.06223	2.32198	1.23045	-1.00106	-13.7902	5.85067e-40	1.85436e-38
ITPRIPL1	3.6905	1.29363	4.77387	1.05592	-1.08337	-13.7033	1.62498e-39	5.0864e-38
IL1R2	2.70748	1.70978	4.17944	1.5665	-1.47196	-13.6591	2.72507e-39	8.48472e-38
HLA-DQA2	7.67652	1.57337	9.04895	1.5094	-1.37243	-13.6482	3.09592e-39	9.60551e-38
CD80	4.1332	1.31737	5.25547	1.16743	-1.12226	-13.6425	3.31086e-39	1.02185e-37
TMEM150B	2.50714	1.30409	3.69324	1.42167	-1.1861	-13.6244	4.08811e-39	1.25954e-37
RUFY4	2.75723	1.6008	4.20676	1.72664	-1.44953	-13.6193	4.3416e-39	1.33531e-37
CASS4	4.03887	1.18201	5.0505	1.07567	-1.01163	-13.6014	5.35151e-39	1.6317e-37
LILRA5	3.6234	1.25762	4.71112	1.1869	-1.08772	-13.5985	5.53621e-39	1.68511e-37
JAKMIP1	3.52139	1.88782	5.08284	1.52818	-1.56145	-13.5654	8.14487e-39	2.47061e-37
APOBEC3A	3.73819	1.51742	5.13557	1.74798	-1.39738	-13.5093	1.56416e-38	4.72836e-37
P2RY6	5.90245	1.19872	6.9114	1.08776	-1.00895	-13.3877	6.39272e-38	1.89995e-36
CCL21	5.34363	2.78698	7.60108	2.20546	-2.25745	-13.3587	8.92365e-38	2.64326e-36
TSHR	2.01588	1.17415	3.06177	1.28385	-1.04589	-13.3273	1.28105e-37	3.78187e-36
TMEM71	4.35643	1.54586	5.63807	1.36683	-1.28164	-13.2872	2.0324e-37	5.97999e-36
C3	12.3945	1.43844	13.5458	1.12669	-1.15131	-13.2277	4.01943e-37	1.17094e-35
TMEM156	3.8495	1.67164	5.1858	1.30582	-1.33629	-13.2209	4.34106e-37	1.25841e-35
IL12RB2	3.47836	2.25033	5.39339	2.21317	-1.91503	-13.213	4.75668e-37	1.37438e-35
ETV7	5.89877	1.43007	7.10192	1.35526	-1.20315	-13.2127	4.77308e-37	1.37686e-35
FPR2	1.82701	1.3367	3.00138	1.45796	-1.17437	-13.1585	8.86046e-37	2.55176e-35
LIME1	5.53916	1.48211	6.7828	1.41212	-1.24364	-13.1565	9.06453e-37	2.60628e-35
ITM2A	7.67973	1.48602	8.83062	1.0223	-1.15089	-13.1526	9.47266e-37	2.71919e-35
HLA-DRB1	11.5122	1.19278	12.5337	1.21292	-1.02151	-13.1463	1.01758e-36	2.90686e-35
ITGAD	2.13179	1.36301	3.34383	1.54553	-1.21203	-13.1246	1.30369e-36	3.71816e-35
KLHDC7B	6.04665	1.89408	7.70846	2.08547	-1.66181	-13.0975	1.77318e-36	5.04898e-35
FAM179A	1.83116	1.29709	2.93062	1.32628	-1.09946	-12.9885	6.09842e-36	1.71163e-34
HLA-DPB2	2.44912	1.22914	3.51015	1.32946	-1.06102	-12.9676	7.71864e-36	2.15609e-34
PTAFR	6.00586	1.27983	7.03836	1.12662	-1.0325	-12.943	1.01894e-35	2.84176e-34
CCL2	8.07036	1.32172	9.1267	1.12798	-1.05634	-12.9301	1.17809e-35	3.27013e-34
IL7	3.66931	1.24379	4.67677	1.11717	-1.00746	-12.9216	1.29633e-35	3.59268e-34
ENTHD1	1.86086	1.29667	2.89404	1.09883	-1.03318	-12.9145	1.40456e-35	3.88654e-34
SLC2A6	6.13508	1.27458	7.15573	1.10214	-1.02065	-12.9096	1.48284e-35	4.09672e-34
MRC1	6.36401	1.66605	7.69614	1.44553	-1.33213	-12.8814	2.0365e-35	5.58267e-34
BCL2L14	3.36631	1.83011	4.85375	1.68632	-1.48744	-12.8742	2.20822e-35	6.04401e-34
LCN10	1.95454	1.53181	3.23686	1.55446	-1.28232	-12.862	2.53223e-35	6.92012e-34
CD84	6.19884	1.4407	7.35427	1.27875	-1.15542	-12.8386	3.29172e-35	8.9679e-34
LOC400696	2.26612	1.68282	3.75833	2.02391	-1.49221	-12.7838	6.07866e-35	1.6459e-33
HTRA4	2.47973	1.26344	3.55817	1.38482	-1.07844	-12.7605	7.87746e-35	2.12969e-33
BATF2	6.01066	1.55697	7.28046	1.49614	-1.2698	-12.754	8.47123e-35	2.28671e-33
GPR15	1.02413	1.1851	2.11846	1.57715	-1.09433	-12.7294	1.11393e-34	2.9932e-33
MEOX1	5.04216	2.11159	6.6243	1.46631	-1.58213	-12.7045	1.46936e-34	3.93031e-33
ABI3BP	7.40264	1.86543	8.84917	1.52236	-1.44653	-12.6925	1.67975e-34	4.48628e-33
RARRES1	7.68993	2.09826	9.36031	1.90508	-1.67038	-12.665	2.27786e-34	6.04712e-33
GRAMD1B	3.5521	1.29841	4.58136	1.17399	-1.02926	-12.6226	3.64479e-34	9.66144e-33
LIPG	4.82465	1.76899	6.18031	1.44481	-1.35566	-12.5408	8.99429e-34	2.3664e-32
PKHD1L1	1.81802	1.46938	3.00519	1.47584	-1.18717	-12.4559	2.2852e-33	5.94151e-32
BCL11A	4.76133	2.48608	6.64173	2.02567	-1.8804	-12.3865	4.87883e-33	1.26292e-31
ABCB1	5.40504	1.60139	6.59342	1.20527	-1.18837	-12.3756	5.49792e-33	1.41901e-31
HAPLN3	7.72835	1.58664	8.95459	1.4087	-1.22624	-12.3721	5.70919e-33	1.47139e-31
DARC	6.67608	2.7597	8.65283	1.80769	-1.97674	-12.2768	1.60835e-32	4.10316e-31
MIAT	6.74552	1.33679	7.78127	1.2368	-1.03575	-12.2556	2.02527e-32	5.15933e-31
KLRC3	1.70194	1.54295	2.88098	1.38073	-1.17904	-12.2054	3.48408e-32	8.84886e-31
REC8	5.16763	1.54897	6.36858	1.45675	-1.20095	-12.2053	3.48862e-32	8.84886e-31
ACHE	3.7024	1.51314	4.8864	1.47887	-1.184	-12.1711	5.04032e-32	1.27481e-30
SLC22A3	3.96151	1.6858	5.25838	1.56717	-1.29687	-12.1532	6.11568e-32	1.54237e-30
MGC29506	6.86024	2.18241	8.49	1.82636	-1.62976	-12.1471	6.5272e-32	1.64147e-30
IL33	6.19839	2.21218	7.79502	1.61149	-1.59663	-12.1221	8.54107e-32	2.14182e-30
RASGRF1	4.25954	1.81923	5.67262	1.78819	-1.41308	-12.0613	1.63872e-31	4.08038e-30
CCL8	5.02785	1.72248	6.34033	1.61928	-1.31248	-11.9973	3.24543e-31	8.04702e-30
MATK	4.92772	1.7666	6.22575	1.49558	-1.29804	-11.9151	7.77582e-31	1.90659e-29
KIAA1045	2.39868	1.47085	3.59975	1.76597	-1.20106	-11.7798	3.24258e-30	7.86325e-29
FCHO1	5.60272	1.64236	6.76146	1.231	-1.15874	-11.7767	3.35007e-30	8.11277e-29
FCAMR	0.78678	1.12308	1.91077	2.01006	-1.12399	-11.7605	3.97002e-30	9.58779e-29
CCL4L2	5.6263	1.38761	6.63619	1.20026	-1.00989	-11.733	5.29546e-30	1.26675e-28
ENPP2	8.32709	1.42443	9.3404	1.13196	-1.0133	-11.7168	6.27911e-30	1.49597e-28
C14orf64	2.77044	1.66041	3.94019	1.27569	-1.16975	-11.6956	7.83471e-30	1.86407e-28
CD209	5.16464	1.48649	6.26208	1.37381	-1.09744	-11.6826	8.9793e-30	2.13065e-28
KIF19	2.56614	1.70922	3.86879	1.75481	-1.30265	-11.6644	1.08576e-29	2.566e-28
IL22RA2	1.66288	1.80249	3.05925	1.98916	-1.39637	-11.5546	3.39866e-29	7.93651e-28
CXCL1	2.84822	2.08225	4.4267	2.167	-1.57848	-11.5491	3.59672e-29	8.38792e-28
STAG3	4.14714	1.27313	5.15204	1.48503	-1.00491	-11.5202	4.84786e-29	1.12759e-27
AMPD1	1.65872	1.61223	2.84747	1.56501	-1.18875	-11.4943	6.33911e-29	1.47057e-27
SPNS3	2.62657	1.36069	3.62816	1.3236	-1.00158	-11.4659	8.49474e-29	1.96291e-27
GPR97	2.30566	1.37261	3.32761	1.38525	-1.02196	-11.4595	9.06563e-29	2.09209e-27
CADM3	4.38927	2.30262	5.97769	1.76698	-1.58842	-11.457	9.30602e-29	2.14196e-27
ST8SIA1	5.70772	1.69509	6.87232	1.31326	-1.16459	-11.3844	1.9613e-28	4.47927e-27
KLRC2	1.85976	1.52106	2.96255	1.4454	-1.10279	-11.3771	2.11206e-28	4.81113e-27
LY75	8.17244	1.50364	9.20054	1.15442	-1.0281	-11.352	2.72944e-28	6.20946e-27
GBP6	2.72318	1.46877	3.83635	1.6211	-1.11318	-11.3022	4.53656e-28	1.02546e-26
IFI44L	8.9318	1.64341	10.0997	1.50272	-1.16793	-11.2818	5.586e-28	1.25305e-26
HLA-DQB2	6.26864	1.68762	7.48088	1.63902	-1.21224	-11.1963	1.32863e-27	2.9467e-26
CHRDL1	6.25754	2.59725	7.98225	1.90711	-1.72471	-11.1352	2.45965e-27	5.38744e-26
PLEKHG7	1.38411	1.53375	2.53132	1.70741	-1.14721	-11.1186	2.90694e-27	6.35137e-26
DHRS9	3.95082	1.59112	5.07489	1.50276	-1.12407	-11.1071	3.26377e-27	7.10465e-26
FLJ40330	4.09654	1.80187	5.38659	1.77786	-1.29005	-11.1035	3.38355e-27	7.3563e-26
ARNTL2	5.2154	1.63268	6.35795	1.50306	-1.14255	-11.0871	3.98909e-27	8.65152e-26
SCARA5	3.4493	2.49044	5.14092	2.06422	-1.69162	-11.0762	4.4491e-27	9.63736e-26
XPNPEP2	2.95166	1.66611	4.07156	1.43279	-1.1199	-10.8547	4.02942e-26	8.5192e-25
TACR1	4.26992	2.00737	5.61692	1.74354	-1.347	-10.8083	6.35822e-26	1.3347e-24
NR4A3	5.72773	1.5899	6.78122	1.33494	-1.05349	-10.7672	9.51861e-26	1.98631e-24
FREM1	4.39104	1.98447	5.6795	1.53736	-1.28846	-10.7596	1.02576e-25	2.13799e-24
ECEL1	2.83025	2.01308	4.19687	1.87666	-1.36662	-10.7167	1.5613e-25	3.23893e-24
GPR126	6.97026	1.92514	8.23364	1.59036	-1.26338	-10.7093	1.67853e-25	3.46581e-24
IL6	3.8114	2.0638	5.18868	1.8205	-1.37728	-10.7039	1.76827e-25	3.64684e-24
HK3	5.16239	1.59741	6.27008	1.61722	-1.10769	-10.6629	2.63773e-25	5.40842e-24
TRPM6	2.48363	1.66949	3.61998	1.62138	-1.13634	-10.6093	4.43645e-25	9.04401e-24
OASL	7.42485	1.60574	8.4882	1.43296	-1.06336	-10.586	5.5618e-25	1.1312e-23
JSRP1	2.26535	1.81901	3.56038	2.08999	-1.29503	-10.4556	1.95074e-24	3.85216e-23
ACY3	2.52522	1.95704	3.81114	1.7992	-1.28592	-10.4154	2.86583e-24	5.64028e-23
EPHB6	5.76276	1.73746	6.89481	1.57118	-1.13205	-10.3769	4.13649e-24	8.11395e-23
HLA-DRB6	7.31404	1.6139	8.39036	1.65181	-1.07632	-10.2174	1.87034e-23	3.59684e-22
HLA-DRB5	9.58945	1.62259	10.6484	1.56258	-1.05895	-10.1994	2.21481e-23	4.2225e-22
CHI3L1	8.63946	2.43971	10.1462	1.92702	-1.50679	-10.19	2.41883e-23	4.59656e-22
PNMA3	2.5756	1.96763	3.82006	1.71772	-1.24445	-10.1731	2.83436e-23	5.34591e-22
C6orf105	3.89391	1.73183	4.96908	1.46656	-1.07517	-10.0666	7.65662e-23	1.41985e-21
COL6A6	3.96513	1.90141	5.18763	1.83808	-1.2225	-10.0369	1.00872e-22	1.86471e-21
CCL11	3.72157	1.59108	4.72624	1.4524	-1.00467	-10.0287	1.08784e-22	2.00677e-21
SLAIN1	4.51287	2.10895	5.74353	1.37474	-1.23066	-10.0091	1.30424e-22	2.40093e-21
GTSF1	1.67824	1.66171	2.77831	1.77948	-1.10007	-9.98317	1.65725e-22	3.03812e-21
TARP	3.38004	2.25827	4.70595	1.62636	-1.32591	-9.88448	4.10489e-22	7.42497e-21
CCL20	2.62069	1.74344	3.76973	1.92612	-1.14904	-9.82576	7.01734e-22	1.25516e-20
RELN	3.41978	2.2032	4.76147	1.99064	-1.34169	-9.70207	2.15248e-21	3.78484e-20
S100B	5.12865	2.35797	6.52804	1.97086	-1.39939	-9.65678	3.23553e-21	5.66105e-20
CDCA7	6.04711	2.07305	7.2905	1.81207	-1.24339	-9.64436	3.61689e-21	6.31578e-20
C7	6.0891	3.08589	7.89773	2.51461	-1.80863	-9.59834	5.46102e-21	9.4984e-20
SLC26A9	1.44464	1.77857	2.62944	2.15102	-1.1848	-9.58168	6.33744e-21	1.09903e-19
CSTA	6.16636	1.76569	7.22029	1.55575	-1.05392	-9.57611	6.66018e-21	1.15386e-19
CHIT1	5.04211	2.62632	6.66602	2.68148	-1.62391	-9.48263	1.52793e-20	2.61123e-19
RBP5	5.55412	1.81371	6.58955	1.42848	-1.03543	-9.42425	2.55757e-20	4.31657e-19
MMP7	8.25333	2.52963	9.74864	2.28224	-1.49531	-9.42191	2.61097e-20	4.4011e-19
NCRNA00092	1.41176	1.60075	2.41919	1.74866	-1.00744	-9.42183	2.61264e-20	4.4011e-19
ABP1	3.34443	2.14491	4.59224	1.83245	-1.24781	-9.41217	2.84438e-20	4.78236e-19
CXCL6	1.31944	1.64086	2.33643	1.74694	-1.01699	-9.36605	4.26324e-20	7.08027e-19
TDO2	4.97569	1.84698	6.03284	1.57567	-1.05715	-9.26318	1.04518e-19	1.7006e-18
SAA2	5.42232	2.71522	6.95571	2.2655	-1.53339	-9.19373	1.90588e-19	3.06714e-18
FMO1	6.12669	1.83558	7.1312	1.3634	-1.00452	-9.15309	2.70418e-19	4.31252e-18
PSAT1	5.93483	2.37081	7.32089	2.27259	-1.38606	-9.15147	2.74209e-19	4.36902e-18
MARCO	3.64223	2.50562	5.18641	2.81747	-1.54418	-9.12786	3.35766e-19	5.31625e-18
PI16	4.6201	2.96196	6.26442	2.39315	-1.64433	-9.11041	3.8992e-19	6.14612e-18
ART3	1.68312	2.35584	3.23444	3.19619	-1.55131	-8.99864	1.00985e-18	1.56385e-17
SAA1	7.23293	2.72378	8.72613	2.20493	-1.4932	-8.99214	1.06694e-18	1.64936e-17
THSD4	10.9843	1.86081	9.86092	2.0615	1.1234	8.99153	1.0725e-18	1.65651e-17
CAPN6	4.49706	2.80055	6.09023	2.60174	-1.59318	-8.99055	1.08138e-18	1.66877e-17
KCNH8	2.27556	1.85157	3.32633	1.72511	-1.05076	-8.95978	1.40262e-18	2.14946e-17
SAA4	1.94571	1.71312	2.96496	1.8457	-1.01926	-8.95271	1.48876e-18	2.27752e-17
STAC	4.0623	1.8448	5.13584	1.87127	-1.07354	-8.94322	1.61279e-18	2.463e-17
CD300LG	3.42414	2.40549	4.78315	2.2234	-1.35901	-8.94176	1.63284e-18	2.49146e-17
CXCL2	3.72284	1.95864	4.83018	1.83442	-1.10735	-8.91232	2.09174e-18	3.18067e-17
SLC19A3	4.34749	2.44626	5.69873	2.12308	-1.35124	-8.89965	2.32659e-18	3.53169e-17
PADI2	9.15493	1.98044	10.248	1.84002	-1.09303	-8.72121	1.02697e-17	1.49589e-16
CACNA2D2	7.91118	1.97223	6.80632	1.96231	1.10486	8.66487	1.63258e-17	2.36436e-16
A2ML1	2.78022	2.91472	4.56188	3.67055	-1.78166	-8.64241	1.96257e-17	2.83297e-16
LBP	3.76698	2.99817	5.49406	3.29759	-1.72708	-8.60375	2.69163e-17	3.85386e-16
FMO2	6.9793	2.166	8.11383	1.76289	-1.13453	-8.57969	3.27448e-17	4.65065e-16
FGFBP1	1.65242	2.24214	2.97874	2.65821	-1.32632	-8.57952	3.27916e-17	4.65355e-16
S100A8	5.7236	2.8208	7.32746	3.08801	-1.60386	-8.50703	5.9018e-17	8.30864e-16
BBOX1	4.27664	2.733	5.75057	2.56222	-1.47392	-8.49988	6.25271e-17	8.78165e-16
B3GNT3	4.82281	2.52345	6.11135	1.99244	-1.28854	-8.42562	1.13626e-16	1.57577e-15
WNT6	2.58093	2.00252	3.73064	2.33965	-1.14971	-8.37617	1.68701e-16	2.3159e-15
C1orf106	6.84875	2.51237	8.13865	2.12198	-1.28991	-8.33194	2.39835e-16	3.24447e-15
CD1A	2.70869	2.2249	3.86687	2.04586	-1.15818	-8.25129	4.5369e-16	6.0862e-15
GABRP	7.24657	3.61303	9.11987	3.4932	-1.8733	-8.09488	1.5386e-15	2.0046e-14
PTX3	4.1246	2.16669	5.25456	2.13502	-1.12995	-8.09204	1.57273e-15	2.04757e-14
VGLL1	3.02163	3.0042	4.66258	3.38921	-1.64095	-8.0802	1.72366e-15	2.23417e-14
EEF1A2	9.47805	2.91871	7.87543	3.33943	1.60262	8.07829	1.74926e-15	2.26403e-14
CNR1	3.96439	2.1071	4.98433	1.59713	-1.01994	-8.06108	1.99799e-15	2.57652e-14
SERPINA11	6.45671	3.19068	4.79645	3.22234	1.66026	8.00974	2.96585e-15	3.76955e-14
TNFSF12-TNFSF13	5.54363	2.56211	6.78846	2.04075	-1.24484	-8.00053	3.18304e-15	4.0282e-14
GABRE	4.89432	2.00246	5.9591	2.16398	-1.06478	-7.99295	3.37323e-15	4.25668e-14
S100A9	7.60189	2.86952	9.09063	2.93506	-1.48874	-7.95188	4.61714e-15	5.76049e-14
TFPI2	5.02348	2.75279	6.34956	2.17029	-1.32608	-7.95168	4.6241e-15	5.7651e-14
PKP1	7.10665	2.80748	8.48452	2.45425	-1.37787	-7.89214	7.27076e-15	8.9573e-14
FABP7	2.91084	3.24089	4.63986	3.68924	-1.72903	-7.86479	8.94253e-15	1.09633e-13
DEGS2	9.70634	2.22185	8.53249	2.47339	1.17385	7.85476	9.64617e-15	1.18177e-13
B3GAT1	2.96703	2.13571	3.98669	1.72899	-1.01966	-7.83054	1.15776e-14	1.41251e-13
TMPRSS6	5.72896	2.82847	4.36149	2.41069	1.36746	7.82748	1.18473e-14	1.43945e-13
LOC145837	5.70194	2.26856	4.53502	2.42004	1.16692	7.76872	1.84068e-14	2.20158e-13
ELF5	5.9851	3.39004	7.58298	2.70985	-1.59788	-7.75531	2.03455e-14	2.41871e-13
UGT8	3.58395	2.41268	4.79322	2.43464	-1.20927	-7.71689	2.70857e-14	3.19847e-13
MLPH	12.1514	2.03992	11.0465	2.53147	1.10493	7.70663	2.92295e-14	3.44011e-13
SFRP1	8.96087	2.96956	10.3782	2.55887	-1.41735	-7.70517	2.95478e-14	3.47526e-13
ADH1B	6.37365	3.84903	8.18959	3.23198	-1.81594	-7.66853	3.87594e-14	4.52851e-13
GJB3	3.59393	2.30463	4.77028	2.50066	-1.17635	-7.66158	4.08018e-14	4.75769e-13
PPP1R14C	4.55052	2.46811	5.82401	2.76893	-1.27349	-7.64888	4.48099e-14	5.20444e-13
ABCC8	6.17787	2.92921	4.72632	2.96606	1.45155	7.62114	5.49672e-14	6.33414e-13
CSAG3	1.41558	2.09014	2.50236	2.45558	-1.08677	-7.56894	8.05878e-14	9.16096e-13
PROM1	7.34061	3.38363	8.91923	3.02356	-1.57862	-7.45707	1.81561e-13	2.00329e-12
PCOLCE2	4.5736	2.45563	5.72082	2.22391	-1.14723	-7.43833	2.07812e-13	2.28581e-12
AQP9	4.57998	2.22147	5.61506	2.10202	-1.03508	-7.32262	4.75279e-13	5.05152e-12
PI3	2.42202	2.65355	3.74593	3.05844	-1.3239	-7.31893	4.87917e-13	5.17339e-12
CXCL5	1.97185	1.99557	2.98946	2.45387	-1.0176	-7.28374	6.26003e-13	6.55095e-12
FLJ45983	7.21993	2.63067	5.96657	2.71999	1.25336	7.27536	6.64173e-13	6.93395e-12
SLC15A1	1.75813	2.25559	2.91716	2.8413	-1.15903	-7.26384	7.20454e-13	7.49051e-12
CT62	4.90277	2.05657	3.90242	2.27428	1.00035	7.2497	7.9588e-13	8.25526e-12
SLC6A14	4.06263	3.06009	5.45757	2.85361	-1.39494	-7.1962	1.15849e-12	1.18976e-11
NCCRP1	4.9502	2.82675	6.23518	2.61733	-1.28499	-7.19132	1.19862e-12	1.22741e-11
PIGR	6.34806	3.34526	7.82914	2.94983	-1.48108	-7.10285	2.21714e-12	2.20391e-11
PLA2G2A	4.76337	2.99724	6.08069	2.59691	-1.31733	-7.08486	2.5106e-12	2.48026e-11
MAPT	10.4414	2.3707	9.32677	2.5925	1.11461	7.03696	3.49028e-12	3.40397e-11
DNAJC12	8.89683	2.19066	7.87795	2.34374	1.01888	7.01697	4.00261e-12	3.88253e-11
FAM135B	3.6244	2.31644	2.60185	2.12699	1.02254	7.0001	4.4915e-12	4.34244e-11
OLFM4	4.25631	3.25022	5.75073	3.41278	-1.49442	-6.98385	5.01813e-12	4.82517e-11
ACE2	2.16311	2.18006	3.18769	2.45213	-1.02458	-6.95981	5.9095e-12	5.63317e-11
CST9	4.0712	3.62027	2.49897	3.23099	1.57223	6.94395	6.58084e-12	6.23273e-11
SLC34A2	6.16829	3.39979	7.65319	3.11625	-1.48489	-6.93022	7.22226e-12	6.81099e-11
TMEM40	3.70282	2.5068	4.79258	2.27258	-1.08977	-6.91956	7.76207e-12	7.28117e-11
FOXA1	12.0538	2.41392	10.8938	2.92571	1.16006	6.90678	8.46163e-12	7.89126e-11
FABP4	7.27754	3.16315	8.63853	2.80826	-1.36099	-6.88962	9.49928e-12	8.79393e-11
MUC16	5.02755	3.28413	6.49521	3.31435	-1.46766	-6.88075	1.00837e-11	9.32028e-11
MMP12	4.05753	2.65413	5.23773	2.65194	-1.1802	-6.86885	1.09232e-11	1.0028e-10
GAL	3.24347	2.27374	4.27772	2.43511	-1.03424	-6.86008	1.15851e-11	1.0608e-10
ESR1	12.1474	3.11965	10.7674	3.09178	1.38002	6.85177	1.22485e-11	1.11752e-10
ADIPOQ	6.13826	3.83451	7.76915	3.37198	-1.63089	-6.82864	1.42981e-11	1.29379e-10
LCN2	5.45323	2.97906	6.75201	2.87937	-1.29878	-6.80709	1.65089e-11	1.48169e-10
STC2	12.1344	2.41727	11.1027	2.18068	1.03179	6.80359	1.68979e-11	1.51429e-10
L1CAM	4.98634	2.45157	6.01394	2.079	-1.0276	-6.79505	1.78868e-11	1.59715e-10
BMPR1B	9.33512	3.62683	7.81712	3.16759	1.518	6.73251	2.70672e-11	2.3644e-10
FUT3	4.44778	2.7055	5.58523	2.43499	-1.13745	-6.70594	3.22434e-11	2.78895e-10
COCH	4.43775	2.46336	5.45752	2.10167	-1.01977	-6.70039	3.3441e-11	2.88406e-10
CA12	12.449	2.16276	11.4446	2.64504	1.00436	6.64873	4.68983e-11	3.98433e-10
LEP	3.46269	2.8349	4.67639	2.79774	-1.2137	-6.64024	4.95703e-11	4.1992e-10
DEFB1	3.78393	2.48923	4.80863	2.28089	-1.02471	-6.5321	9.97951e-11	8.20579e-10
CIDEC	4.31342	3.05041	5.56577	2.77719	-1.25235	-6.52704	1.03093e-10	8.44547e-10
TF	5.61483	2.75714	6.73717	2.43736	-1.12234	-6.52574	1.03959e-10	8.50463e-10
HSD17B2	3.20206	2.56158	4.27807	2.53537	-1.07601	-6.5088	1.15884e-10	9.42336e-10
PLCH1	5.862	2.72422	6.94398	2.25883	-1.08198	-6.47608	1.42826e-10	1.15187e-09
HP	3.19143	2.49767	4.21333	2.33863	-1.0219	-6.45068	1.67885e-10	1.34171e-09
DACH1	8.31472	2.39886	7.30385	2.47295	1.01087	6.44129	1.78206e-10	1.41906e-09
FSIP1	7.17052	2.63846	6.04943	2.83519	1.12109	6.40068	2.30408e-10	1.80864e-09
ABCA8	5.2335	2.47946	6.23479	2.31632	-1.00128	-6.37132	2.77206e-10	2.15301e-09
CEACAM5	7.17178	3.60497	5.68271	3.63522	1.48907	6.36161	2.94629e-10	2.28031e-09
RHCG	2.1173	2.35265	3.11785	2.60772	-1.00055	-6.33332	3.51748e-10	2.69521e-09
AKR7A3	8.10072	2.61629	7.01833	2.71119	1.08239	6.31261	4.00301e-10	3.05267e-09
CHI3L2	7.24216	2.59106	8.27071	2.37704	-1.02855	-6.29676	4.41804e-10	3.34317e-09
TUSC5	4.22978	3.27303	5.52043	2.95826	-1.29065	-6.28237	4.83125e-10	3.6294e-09
KRT5	8.74324	3.7057	10.1814	3.16585	-1.43818	-6.27982	4.90836e-10	3.68419e-09
SYTL5	6.67369	2.67095	5.55771	2.91896	1.11597	6.25523	5.71574e-10	4.25763e-09
SLPI	7.78639	2.77144	8.86525	2.51619	-1.07886	-6.1937	8.34785e-10	6.08476e-09
SCUBE2	11.226	2.92293	10.0474	2.97144	1.17854	6.19278	8.39506e-10	6.11665e-09
CAPN8	7.16403	2.92728	5.99729	2.87832	1.16674	6.18926	8.57811e-10	6.23517e-09
DSC3	6.28598	2.99033	7.45009	2.79322	-1.16412	-6.14245	1.14156e-09	8.19563e-09
TRIM29	8.02282	2.81822	9.08818	2.39606	-1.06536	-6.12434	1.27439e-09	9.09015e-09
AGR3	9.45987	3.80375	7.90215	4.23774	1.55771	6.08728	1.59482e-09	1.12171e-08
ROPN1	2.51453	2.74799	3.62745	2.98186	-1.11292	-6.07918	1.67467e-09	1.1732e-08
KCNJ3	5.05493	4.13651	3.4904	3.66846	1.56453	6.05838	1.89805e-09	1.31818e-08
ERBB4	8.80978	2.81265	7.68717	2.97581	1.12261	6.04608	2.04347e-09	1.41361e-08
RGS22	5.23783	2.75299	4.19372	2.49042	1.04412	6.04067	2.11088e-09	1.45739e-08
GRIA2	4.21451	3.8627	2.81849	3.01101	1.39602	5.98175	3.00055e-09	2.02665e-08
KLK10	4.60741	3.21703	5.8163	3.00192	-1.20889	-5.93109	4.04996e-09	2.67883e-08
SLC44A4	10.3413	2.73392	9.2417	3.14646	1.09961	5.90367	4.75938e-09	3.11309e-08
GPD1	5.98495	2.79828	7.02871	2.61417	-1.04376	-5.88503	5.30928e-09	3.44469e-08
STAC2	5.86959	3.63344	7.18745	3.23153	-1.31786	-5.80505	8.45847e-09	5.34094e-08
DSG3	5.30333	3.2645	6.5204	3.27749	-1.21706	-5.75012	1.16079e-08	7.18282e-08
KLK6	4.18692	3.09247	5.35453	3.24189	-1.16761	-5.73809	1.24371e-08	7.65835e-08
MUC15	4.26388	3.0617	5.34701	2.84422	-1.08313	-5.59112	2.85855e-08	1.65785e-07
ATP13A5	3.0642	2.79735	4.07179	2.81711	-1.0076	-5.54964	3.6028e-08	2.05571e-07
FOLR1	4.44367	3.00837	5.49744	2.78866	-1.05377	-5.53948	3.81197e-08	2.16527e-07
LY6D	2.33252	2.73423	3.36462	3.17743	-1.03209	-5.51934	4.26229e-08	2.40174e-07
CYP2B7P1	8.29639	4.03555	6.8496	4.23764	1.44678	5.44548	6.39852e-08	3.50479e-07
SOX10	5.23326	3.66754	6.49516	3.42878	-1.26189	-5.42764	7.0528e-08	3.84291e-07
CPB1	7.19081	5.29397	5.4054	4.70746	1.78542	5.39821	8.27729e-08	4.44696e-07
TNNT1	7.40145	3.08871	6.35228	3.0662	1.04917	5.25845	1.75142e-07	8.90797e-07
SLITRK6	8.21147	3.21431	7.13809	3.02738	1.07338	5.25595	1.77479e-07	9.01386e-07
SYT9	5.8279	3.11749	4.7677	3.11686	1.0602	5.2524	1.80852e-07	9.17461e-07
LTF	10.6135	3.7117	11.8054	3.08317	-1.19196	-5.23418	1.99138e-07	1.0033e-06
KRT16	5.72787	3.22964	6.82445	3.37678	-1.09658	-5.16496	2.86362e-07	1.40273e-06
KRT17	8.90097	3.32518	9.97267	2.96896	-1.0717	-5.15263	3.05367e-07	1.48736e-06
KRT81	6.16956	3.12015	7.24838	3.4528	-1.07882	-5.15247	3.05611e-07	1.48794e-06
C20orf114	6.69153	3.37709	5.55793	3.47045	1.13359	5.1368	3.31558e-07	1.6085e-06
S100A7	3.1233	4.06072	4.49978	4.35325	-1.37648	-5.11095	3.79069e-07	1.82296e-06
C1orf64	7.1515	3.52742	5.97822	3.74659	1.17328	5.03175	5.69194e-07	2.65553e-06
BPIL1	4.62414	3.41164	3.54778	3.09512	1.07636	5.02106	6.01041e-07	2.79378e-06
TFF3	10.3467	3.51978	9.20241	3.7109	1.14431	4.93111	9.46347e-07	4.2652e-06
AGR2	11.927	3.2244	10.868	3.57911	1.05896	4.88848	1.17054e-06	5.19344e-06
CALML5	6.36611	3.65115	7.51326	3.7602	-1.14715	-4.80453	1.77067e-06	7.59646e-06
CP	7.49337	3.606	8.52366	2.86212	-1.03029	-4.70901	2.81401e-06	1.16589e-05
KRT6B	6.58286	3.53856	7.64596	3.39531	-1.06309	-4.70167	2.91498e-06	1.2049e-05
CRABP1	5.14732	3.7421	6.21058	3.19386	-1.06326	-4.59876	4.75406e-06	1.8954e-05
PIP	8.83888	4.30884	7.59481	3.99604	1.24407	4.56562	5.55381e-06	2.18319e-05
KRT14	8.28868	3.78444	9.34271	3.29223	-1.05403	-4.48488	8.07749e-06	3.07858e-05
SLC30A8	4.9189	3.93822	3.81943	3.66888	1.09947	4.40869	1.14411e-05	4.23618e-05
TFF1	8.94257	4.32396	7.75606	4.50762	1.18651	4.17862	3.17039e-05	0.000107863
ANKRD30A	7.28405	4.08211	6.18922	4.01147	1.09483	4.16575	3.35172e-05	0.000113573
CLEC3A	5.15592	5.38007	4.06258	4.71674	1.09334	3.26559	0.00112678	0.00277292
